# Supplementary material for: Fluorescence calibration standards made from broadband emitters encapsulated in polymer beads for fluorescence microscopy and flow cytometry
Source: Springer Nature journal article supplement (doi:10.1007/s00216-020-02664-y), 2020-05-14
Supplement: MOESM1 [file 216_2020_2664_MOESM1_ESM.pdf]

**Analytical and Bioanalytical Chemistry**

**Electronic Supplementary Material**

**Fluorescence calibration standards made from broadband emitters encapsulated in polymer beads for fluorescence microscopy and flow cytometry**

Katrin Hoffmann, Nithiya Nirmalanathan-Budau, Ute Resch-Genger

## Content

1. Control images of non-modified beads (**Figure S1**)
2. Fluorescence data of candidate calibration beads in ensemble and at single particle level (**Table S1**)
3. Information on fluorescence quantum yields and on bead staining homogeneity (**Table S2**)
4. Microscopic investigation of candidate calibration beads (**Figure S2**)

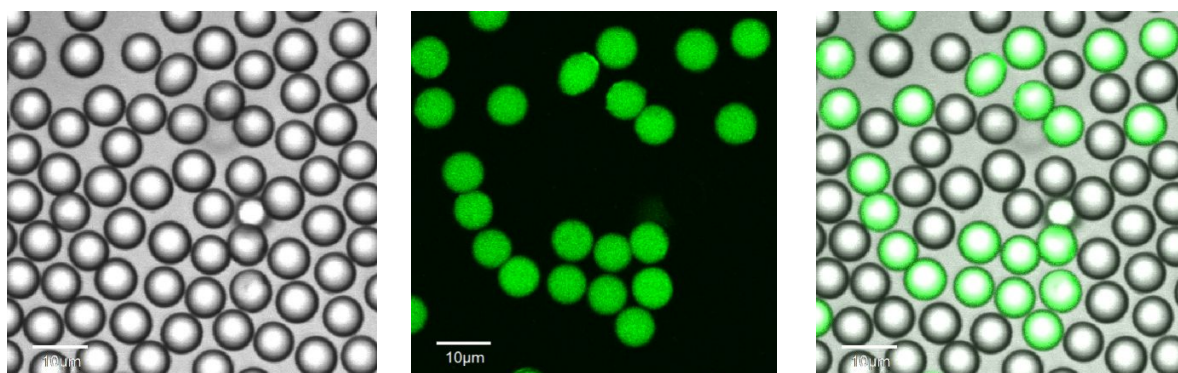

**Fig. S1** Control images of an exemplary mixture of non-modified polystyrene (PS) beads (8  $\mu\text{m}$ ) and PS beads with encapsulated Dye D: transmission image (left), fluorescence image (middle) and their overlay (right). No emission signal can be detected from the non-modified PS beads

**Table S1** Fluorescence data (emission wavelengths) of dyes measured in different environments, in ethanolic solution, and in 8  $\mu\text{m}$  polystyrene (PS) beads in aqueous suspensions in the ensemble and at single particle level

| fluorophore              | EtOH        | emission wavelength $\lambda_{\text{max}}/\text{nm}$ |                                        |
|--------------------------|-------------|------------------------------------------------------|----------------------------------------|
|                          |             | 8 $\mu\text{m}$ PS (ensemble)                        | 8 $\mu\text{m}$ PS (single bead level) |
| DyeA                     | 329 $\pm$ 2 | 330 $\pm$ 0.5                                        | n.d.                                   |
| DyeB                     | 390 $\pm$ 2 | 370 $\pm$ 0.5                                        | n.d.                                   |
| DyeC                     | 456 $\pm$ 2 | 420 $\pm$ 0.5                                        | 422 $\pm$ 0.8                          |
| DyeD                     | 530 $\pm$ 2 | 480 $\pm$ 0.5                                        | 485 $\pm$ 2                            |
| DyeE                     | 636 $\pm$ 2 | 575 $\pm$ 0.5                                        | 576 $\pm$ 0.8                          |
| DyeO ClO <sub>4</sub>    | 664 $\pm$ 2 | 668 $\pm$ 0.5                                        | 669 $\pm$ 3.6                          |
| DyeO ClO <sub>4</sub> US | -           | 654 $\pm$ 0.5                                        | -                                      |
| DyeO PF6                 | -           | 668 $\pm$ 0.5                                        | -                                      |
| DyeO BARF                | -           | 673 $\pm$ 0.5                                        | -                                      |
| DyeO BARF US             | -           | 672 $\pm$ 0.5                                        | 678 $\pm$ 0.8                          |
| DyeI ClO <sub>4</sub>    | 766 $\pm$ 2 | 726 $\pm$ 0.5                                        | 719 $\pm$ 0.5                          |
| DyeI ClO <sub>4</sub>    | -           | 724 $\pm$ 0.5                                        | -                                      |
| DyeI PF6                 | -           | 733 $\pm$ 0.5                                        | -                                      |
| DyeI BARF                | -           | 772 $\pm$ 0.5                                        | 742 $\pm$ 0.8                          |

\*) Standard deviations derived from the wavelength accuracy of the fluorescence instrument

\*\*) Standard deviations derived from evaluation of single bead spectra (N  $\geq$  5)

\*\*\*) US: ultrasound

**Table S2** Fluorescence quantum yields (QY) of dispersions of dye-encoded 8  $\mu\text{m}$  polystyrene (PS) beads absolutely measured with a C11347 (Hamamatsu Photonics K.K.) integrating sphere setup (error represents the standard deviation (SD) of twelve independent measurements). The integral and average intensities of different bead-related regions of interest (ROI) of the dyes-stained bead batches were obtained to estimate bead staining homogeneity

| fluorophore | Quantum yield/ %                 |                               | Staining homogeneity (integral bead intensity) |                         |
|-------------|----------------------------------|-------------------------------|------------------------------------------------|-------------------------|
|             | $\lambda_{\text{exc}}/\text{nm}$ | 8 $\mu\text{m}$ PS (ensemble) | ROI integration                                | ROI average             |
| DyeC        | 355                              | 87 $\pm$ 3                    | 5.40E+06 $\pm$ 3.28E+05                        | 2.64E+03 $\pm$ 1.60E+02 |
| DyeD        | 488                              | 31 $\pm$ 2                    | 2.99E+06 $\pm$ 1.61E+05                        | 1.98E+03 $\pm$ 1.02E+02 |
| DyeE        | 515                              | 66 $\pm$ 2                    | 5.29E+06 $\pm$ 3.05E+05                        | 2.87E+03 $\pm$ 1.66E+02 |
| DyeO*)      | 633                              | 5 $\pm$ 1                     | 5.11E+06 $\pm$ 1.08E+06                        | 1.94E+03 $\pm$ 4.08E+02 |
| DyeI*)      | 633                              | 12 $\pm$ 1                    | 4.17E+06 $\pm$ 1.74E+06                        | 2.33E+03 $\pm$ 9.72E+02 |

\*) counterion ClO<sub>4</sub>

| Counter anion  | $\text{ClO}_4^-$                                                                   | $\text{BF}_4^-$                                                                   | $\text{PF}_6^-$                                                                    | BARF                                                                                |
|----------------|------------------------------------------------------------------------------------|-----------------------------------------------------------------------------------|------------------------------------------------------------------------------------|-------------------------------------------------------------------------------------|
| DyeO           | 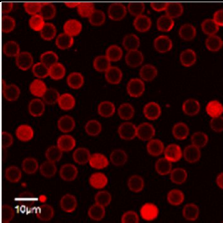  |  |  |  |
| DyeI           |   |  |  |  |
| Hydrophobicity |  |                                                                                   |                                                                                    |                                                                                     |

**Fig. S2** Visual, microscopic investigation of candidate calibration beads during the course of counter anion exchange studies (confocal laser scanning Microscope OLYMPUS FV1000; UPLSAPO 40x/0.9; excitation wavelength 633 nm)
